# Supplementary material
Source: PubMed Central journal article supplement (PMC7518855)
Supplement: mmc2.pdf [file mmc2.pdf]

## Supporting Information

### The endless quarantine: The impact of the COVID-19 outbreak on healthcare workers after three months of mandatory social isolation in Argentina

Daniela L. Giardino<sup>a</sup>, Cristián Huck-Iriart<sup>b</sup>, Maximiliano Riddick<sup>c</sup>, Arturo Garay<sup>a</sup>

<sup>a</sup> Medicina del Sueño-Neurología-Centro de Educación Médica e Investigaciones Clínicas “Norberto Quirno” (CEMIC), Buenos Aires , Argentina

<sup>b</sup> Escuela de Ciencia y Tecnología, Universidad Nacional de San Martín (UNSAM), Buenos Aires, Argentina

<sup>c</sup> Departamento de Matemáticas-Facultad de Ciencias Exactas-UNLP-CONICET, Buenos Aires, Argentina

**Table S1.** Demographic characteristics

| Demographic characteristics                | N (%)       |
|--------------------------------------------|-------------|
| AMBA (Buenos Aires City and surroundings ) | 871 (82.2%) |
| Provincia de Buenos Aires (NO AMBA)        | 60 (5.7%)   |
| Salta                                      | 3 (0.3%)    |
| Santiago del Estero                        | 13 (1.2%)   |
| Mendoza                                    | 21 (2.0%)   |
| Córdoba                                    | 33 (3.1%)   |
| Neuquén                                    | 11 (1.0%)   |
| Chubut                                     | 7 (0.7%)    |
| Place of work                              |             |
| Santa Fe                                   | 10 (0.9%)   |
| La Pampa                                   | 3 (0.3%)    |
| San Luis                                   | 1 (0.1%)    |
| Entre Ríos                                 | 3 (0.3%)    |
| Tucumán                                    | 14 (1.3%)   |
| Río Negro                                  | 2 (0.2%)    |
| La Rioja                                   | 2 (0.2%)    |
| Corrientes                                 | 4 (0.4%)    |
| Chaco                                      | 1 (0.1%)    |

|                                        |                                                        |              |                                                |
|----------------------------------------|--------------------------------------------------------|--------------|------------------------------------------------|
| Gender                                 | Male (M)                                               | 287 (27.1%)  |                                                |
|                                        | Female (F)                                             | 770 (72.7%)  |                                                |
|                                        | Non Binary (NB)                                        | 2 (0.2%)     |                                                |
| Work sector                            | Public                                                 | 328 (31.0%)  |                                                |
|                                        | Private                                                | 425 (40.1%)  |                                                |
|                                        | Both                                                   | 306 (28.9%)  |                                                |
| Role within the healthcare environment | Physician                                              | 583 (55.1%)  | F: 391(67.%),<br>M: 191 (32.8%)<br>NB: 1 (0.2) |
|                                        | Other (nutritionist, psychologist, kinesiologist, etc) | 140 (13.2%)  | F: 111 (79.3%)<br>M: 29 (20.7%)                |
|                                        | Administrative staff                                   | 85 (8.0%)    | F: 70 (82.4%)<br>M: 15 (17.6%)                 |
|                                        | Nurse                                                  | 79 (7.5%)    | F: 61 (77.2%).<br>M: 18 (22.8%)                |
|                                        | Technician, Phlebotomist, Surgical Instruments         | 50 (4.7%)    | F: 39 (78.0%)<br>M: 11 (22.0%)                 |
|                                        | Physician in trainee Resident                          | 121 (11.4%)  | F: 97 (80.2%)<br>M: 23 (19.0%)<br>NB: 1 (0.8%) |
|                                        | Security personnel                                     | 1 (0.1%)     | F: 1 (100%)                                    |
|                                        | Work in contact COVID-19 patients                      | Yes          | 690 (65.2%)                                    |
| No                                     |                                                        | 369 (34.8%)  |                                                |
| Who they live with?                    | With other adults                                      | 436 (41.2%)  |                                                |
|                                        | Alone                                                  | 196 (18.5%)  |                                                |
|                                        | With children over 10 years old                        | 160 (15.1%)  |                                                |
|                                        | With children between 4 and 10 years old               | 148 (14.1%)  |                                                |
|                                        | With children under 4 years old                        | 118(11.1%)   |                                                |
| COVID-19 Positive                      | No                                                     | 1040 (98.2%) |                                                |
|                                        | Yes                                                    | 19 (1.8%)    |                                                |

|                                            |                            |             |
|--------------------------------------------|----------------------------|-------------|
|                                            | No                         | 435 (41.1%) |
|                                            | Yes                        | 624 (58.9%) |
| Nightmares and violent dreams              | • 3 or more times per week | 96 (9.1%)   |
|                                            | • 1 to 2 times per week    | 230 (21.7%) |
|                                            | • Less than once a week    | 298 (28.1%) |
| Consumption of sleep medication Pre-MSI    | No                         | 959 (90.6%) |
|                                            | Yes                        | 100 (9.4%)  |
| Consumption of sleep medication during MSI | No                         | 698 (65.8%) |
|                                            | Yes                        | 361 (34.2%) |
|                                            | • 3 or more times per week | 147 (13.9%) |
|                                            | • 1 to 2 times per week    | 98 (9.3%)   |
|                                            | • Less than once a week    | 116 (11.0%) |

**Table S2.** Cramér's V coefficients for the categorical predictor variables. The coefficient limits are 0 for unassociated and 1 for fully associated variables.

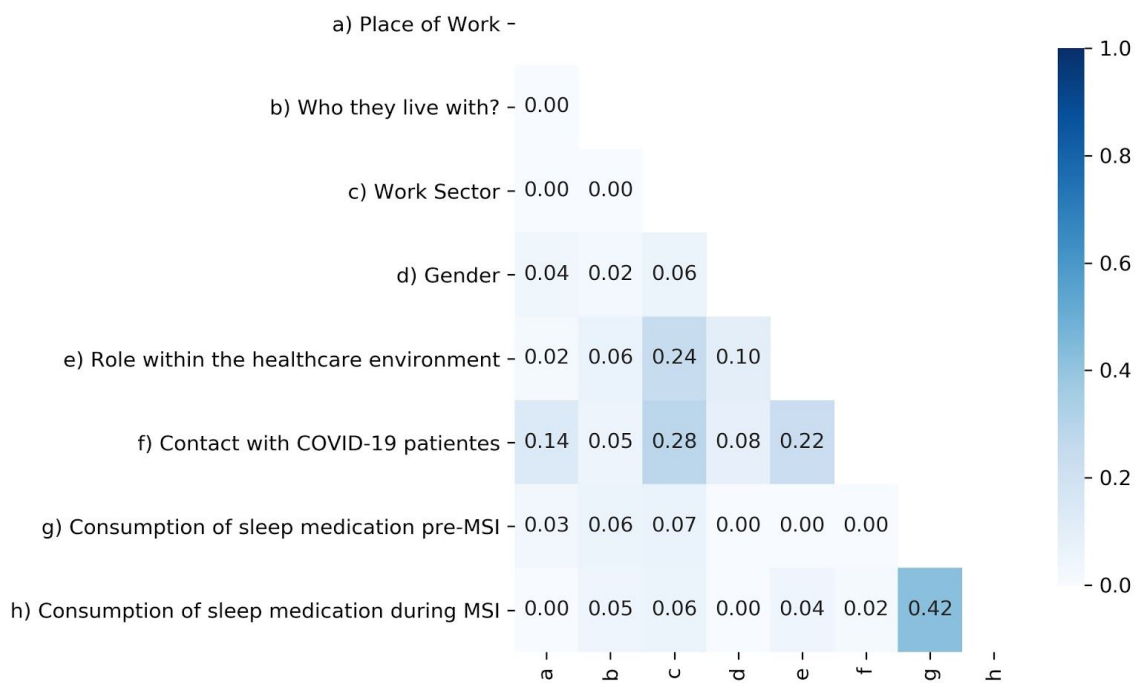

**Table S3.** Mann Whitney and Kruskal-Wallis test for comparison of Age with the categorical variables..

| Categorical variable                       | $\chi^2$ | degrees of freedom | p-value |
|--------------------------------------------|----------|--------------------|---------|
| Place of Work                              | 8.568    | 1                  | 0.0034  |
| Who they live with?                        | 33.84    | 2                  | <0.0001 |
| Work sector                                | 21.79    | 2                  | <0.0001 |
| Gender                                     | 7.548    | 1                  | 0.0060  |
| Role within the healthcare environment     | 1.005    | 1                  | 0.316   |
| Contact with COVID-19 patientes            | 11.24    | 1                  | 0.0008  |
| Consumption of sleep medication pre-MSI    | 22.33    | 1                  | <0.0001 |
| Consumption of sleep medication during MSI | 14.30    | 1                  | 0.0001  |

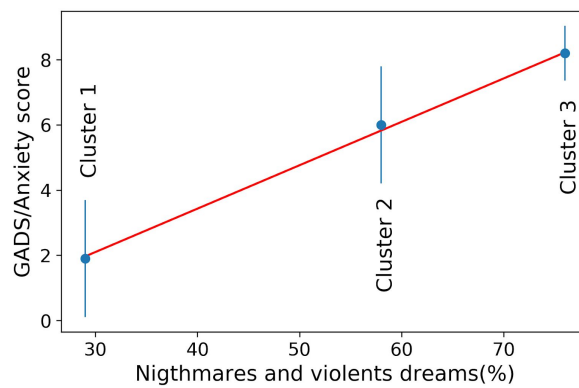

**Figure S1.** Linear Correlation between anxiety and % of subjects suffering from Nightmares and violent dreams between clusters

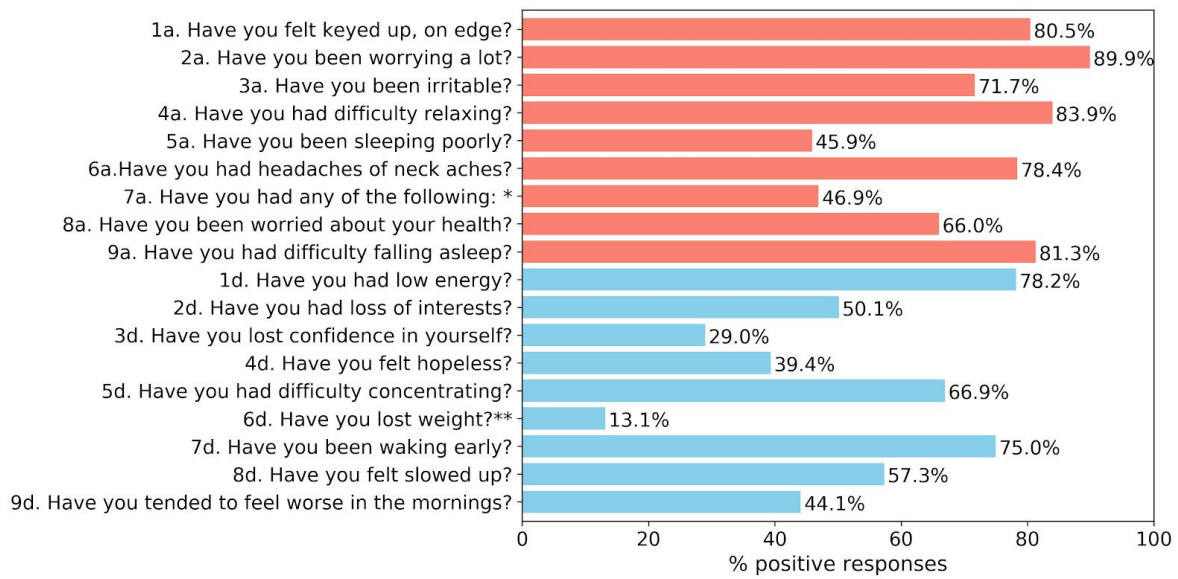

**Figure S2.** GADS subanalysis for anxiety (a-red) and depression (d-blue). The dashed line represents 50% of positive responses. \* (Trembling, tingling, dizzy spells, sweating, frequency, diarrhoea), \*\* (due to poor appetite)

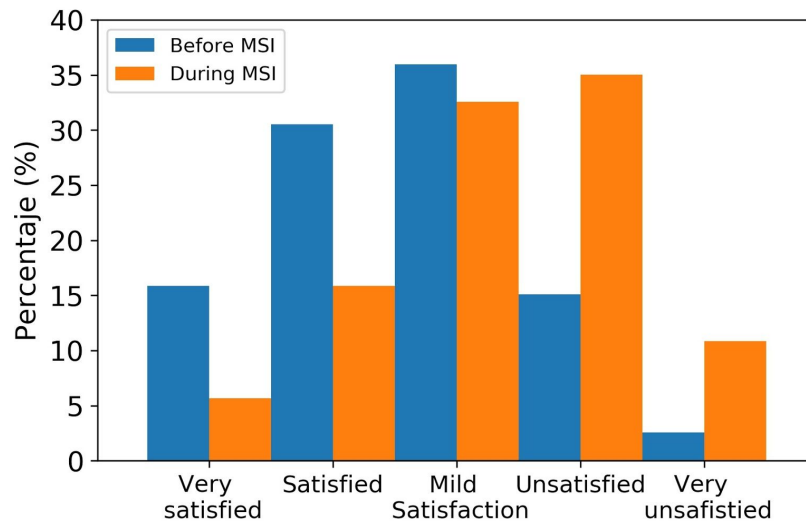

**Figure S3.** Sleep satisfaction before and during MSI (N = 1059)
